# Supplementary material for: Upregulate KIF4A Enhances Proliferation, Invasion of Hepatocellular Carcinoma and Indicates poor prognosis Across Human Cancer Types
Source: PubMed Central journal article supplement (PMC5482880; doi:10.1038/s41598-017-04176-9), 2017-06-23
Supplement: 41598_2017_4176_MOESM1_ESM.pdf [file 41598_2017_4176_MOESM1_ESM.pdf]

# Upregulate KIF4A Enhances Proliferation, Invasion of Hepatocellular Carcinoma and Indicates poor prognosis Across Human Cancer Types

Guojun Hou<sup>1,\*</sup>, Chuanpeng Dong<sup>3,\*</sup>, Zihui Dong<sup>2,\*</sup>, Gang Liu<sup>3,\*</sup>, Huilin Xu<sup>3</sup>, Lei Chen<sup>2</sup>, Lei Liu<sup>3, §</sup>, Hongyang Wang<sup>2, §</sup>, Weiping Zhou<sup>1, §</sup>

<sup>1</sup>The Third Department of Hepatic Surgery, Third Affiliated Hospital of Second Military Medical University, Shanghai, 200438, China;

<sup>2</sup> National Center for Liver Cancer, Shanghai, 201805, China;

<sup>3</sup> Institutes of Biomedical Sciences, Fudan University, 200032;

\*These authors have contributed equally to this work

§Corresponding authors:

Weiping Zhou: [ehphwp3@126.com](mailto:ehphwp3@126.com)

Hongyang Wang: [hywangk@vip.sina.com](mailto:hywangk@vip.sina.com)

Lei Liu: [liulei\\_sibs@163.com](mailto:liulei_sibs@163.com)

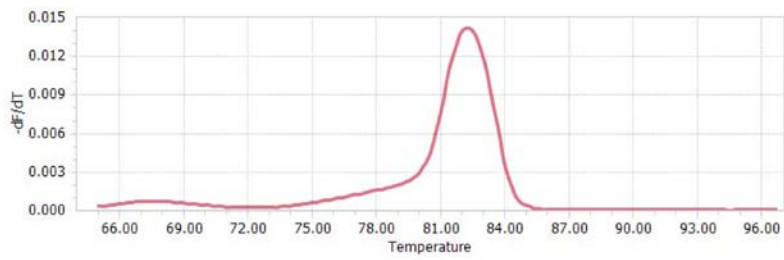

Supplementary Figure 1. The melting curve.

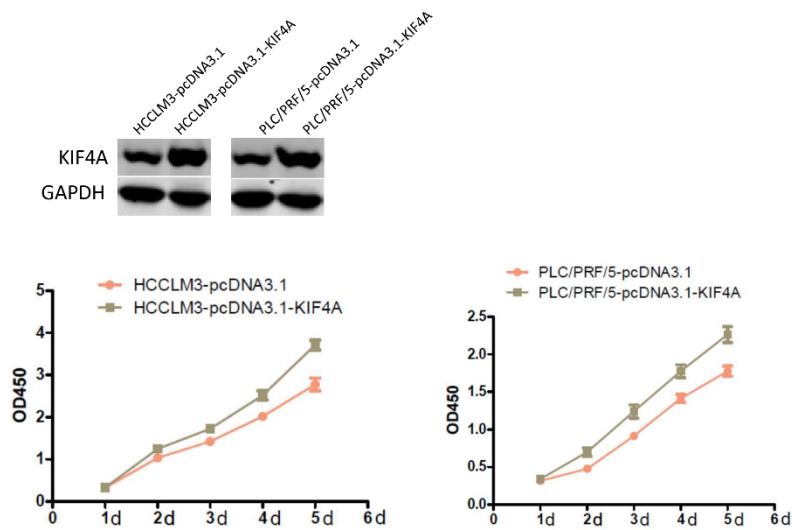

Supplementary Figure 2. The proliferation rate of HCC cell lines after overexpression of KIF4A using pc-DNA3.1-KIF4A (top) was enhanced compared to the control (Bottom left, HCCLM3 cell line; bottom right PLC/PRF/5 cell line). The y-axis indicates OD450 values, and x-axis indicates time points (in days).

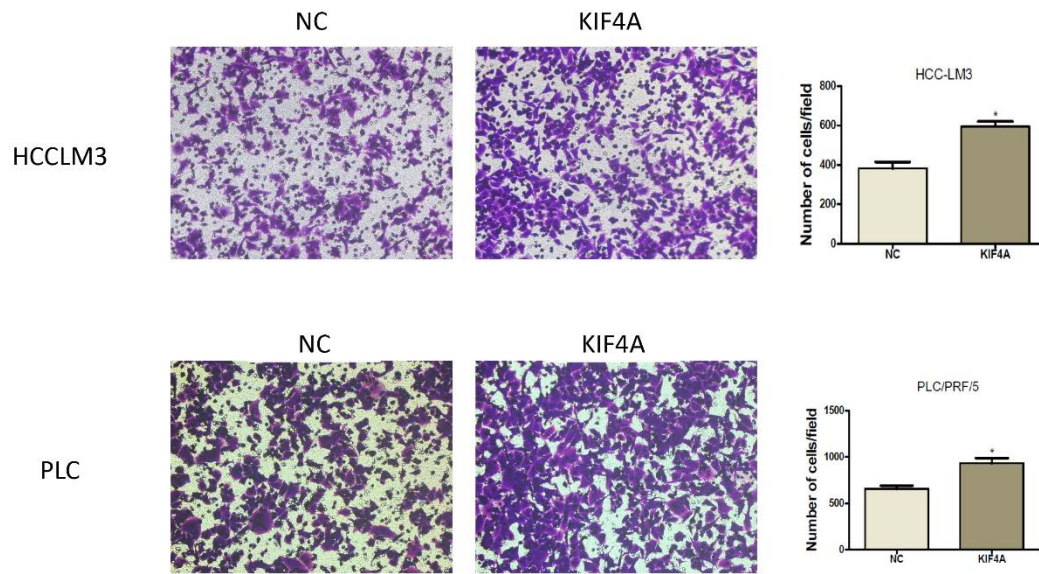

Supplementary Figure 3. The migration rate of HCC cell lines after overexpression of KIF4A using pc-DNA3.1-KIF4A was enhanced compared to the control (top, HCC-LM3 cell line; bottom, PLC/PRF/5 cell line).

Supplementary Table S1: Information of TCGA datasets used in this study.

| Cancer Types                             | Number of sample | Overall survival | Number of Event |
|------------------------------------------|------------------|------------------|-----------------|
| Adrenocortical Carcinoma                 | 79               | YES              | 27              |
| Acute Myeloid Leukemia                   | 173              | YES              | 103             |
| Brain Lower Grade Glioma                 | 530              | YES              | 92              |
| Bladder Urothelial Carcinoma             | 407              | YES              | 128             |
| Breast Cancer                            | 1102             | YES              | 133             |
| Cervical Squamous Cell<br>Carcinoma      | 305              | YES              | 70              |
| Colorectal Adenocarcinoma                | 383              | YES              | 70              |
| Esophageal carcinoma                     | 185              | YES              | 69              |
| Glioblastoma Multiforme                  | 167              | YES              | 114             |
| Kidney Renal Clear Cell<br>Carcinoma     | 534              | YES              | 166             |
| Kidney Renal Papillary Cell<br>Carcinoma | 291              | YES              | 31              |
| Liver Hepatocellular Carcinoma           | 371              | YES              | 107             |
| Lung Adenocarcinoma                      | 513              | YES              | 141             |
| Lung Squamous Cell<br>Carcinoma          | 502              | YES              | 185             |
| Stomach Adenocarcinoma                   | 384              | YES              | 122             |

|                             |     |     |     |
|-----------------------------|-----|-----|-----|
| Ovarian Serous              |     |     |     |
| Cystadenocarcinoma          | 266 | YES | 148 |
| Pancreatic Adenocarcinoma   | 179 | YES | 83  |
| Prostate Adenocarcinoma     | 498 | NO  | NA  |
| Skin Cutaneous Melanoma     | 472 | YES | 200 |
| Head and Neck Squamous Cell |     |     |     |
| Carcinoma                   | 521 | YES | 191 |
| Sarcoma                     | 262 | YES | 79  |
| Thyroid Carcinoma           | 513 | NO  | NA  |
| Testicular Germ Cell Cancer | 156 | NO  | NA  |
| Uterine Corpus Endometrioid |     |     |     |
| Carcinoma                   | 175 | YES | 23  |
| Uterine Carcinoma           | 57  | YES | 33  |

---

Supplementary Table S2: KM survival and Cox regression analysis of KIF4A expression

(median cutoff) on overall survival in patients across cancer types

| <b>Cancer Type</b> | <b>Log rank p</b> | <b>HR with 95% CI</b> | <b>p Value</b> |
|--------------------|-------------------|-----------------------|----------------|
| ACC                | 4.41E-06          | 6.71(2.66 - 16.91)    | 5.39E-05       |
| LAML               | 0.4309            | 0.85(0.58 - 1.26)     | 0.4239         |
| BLCA               | 0.4242            | 1.15(0.81 - 1.63)     | 0.4256         |
| BRAC               | 0.0031            | 1.68(1.19 - 2.39)     | 0.0034         |
| CESC               | 0.3523            | 0.80(0.50 - 1.28)     | 0.3528         |
| COADREAD           | 0.1942            | 0.73(0.45 - 1.17)     | 0.1954         |
| ESCA               | 0.0303            | 1.70(1.05 - 2.77)     | 0.0322         |
| GBM                | 0.9734            | 1.00(0.69 - 1.45)     | 0.9922         |
| HNSC               | 0.5929            | 1.08(0.81 - 1.44)     | 0.5929         |
| KIRC               | 4.90E-05          | 1.90(1.39 - 2.61)     | 6.49E-05       |
| KIRP               | 0.0152            | 2.47(1.16 - 5.27)     | 0.0188         |
| LGG                | 2.28E-05          | 2.73(1.68 - 4.43)     | 4.69E-05       |
| LIHC               | 0.0004            | 1.87(1.32 - 2.67)     | 0.0005         |
| LUAD               | 0.0056            | 1.60(1.14 - 2.25)     | 0.0061         |
| LUSC               | 0.1898            | 0.82(0.62 - 1.10)     | 0.1908         |
| OV                 | 0.2027            | 1.23(0.89 - 1.71)     | 0.2041         |
| PAAD               | 0.0024            | 1.97(1.26 - 3.08)     | 0.0028         |
| SARC               | 0.4549            | 1.18(0.76 - 1.84)     | 0.456          |
| SKCM               | 0.0128            | 1.43(1.08 - 1.89)     | 0.0133         |
| STAD               | 0.9868            | 1.00(0.70 - 1.43)     | 0.9865         |
| UCEC               | 0.0592            | 2.42(0.94 - 6.22)     | 0.0674         |
| UCS                | 0.5998            | 0.83(0.41 - 1.67)     | 0.603          |
